# Supplementary material for: Assessment of TSPO in a Rat Experimental Autoimmune Myocarditis Model: A Comparison Study between [18F]Fluoromethyl-PBR28 and [18F]CB251
Source: Int J Mol Sci. 2018 Jan 17;19(1):276. doi: 10.3390/ijms19010276 (PMC5796222; doi:10.3390/ijms19010276)
Supplement: Supplementary file 1 [file ijms-19-00276-s001.pdf]

# **Supplementary Information**

## **Assessment of TSPO in a Rat Experimental Autoimmune Myocarditis Model: A Comparison Study between [ $^{18}\text{F}$ ]Fluoromethyl-PBR28 and [ $^{18}\text{F}$ ]CB251**

Ga Ram Kim, Jin Chul Paeng, Jae Ho Jung, Byung Seok Moon, Antonio Lopalco, Nunzio Denora,

Byung Chul Lee\* and Sang Eun Kim\*

- I. Representative HPLC chromatogram for [ $^{18}\text{F}$ ]Fluoromethyl-PBR28**
- II. Representative HPLC chromatogram for [ $^{18}\text{F}$ ]CB251**
- III. *In vitro* binding assay**
- IV. PET images based time-activity curves analysis**
- V. Reference**

## I. Representative HPLC chromatogram for [ $^{18}\text{F}$ ]Fluoromethyl-PBR28

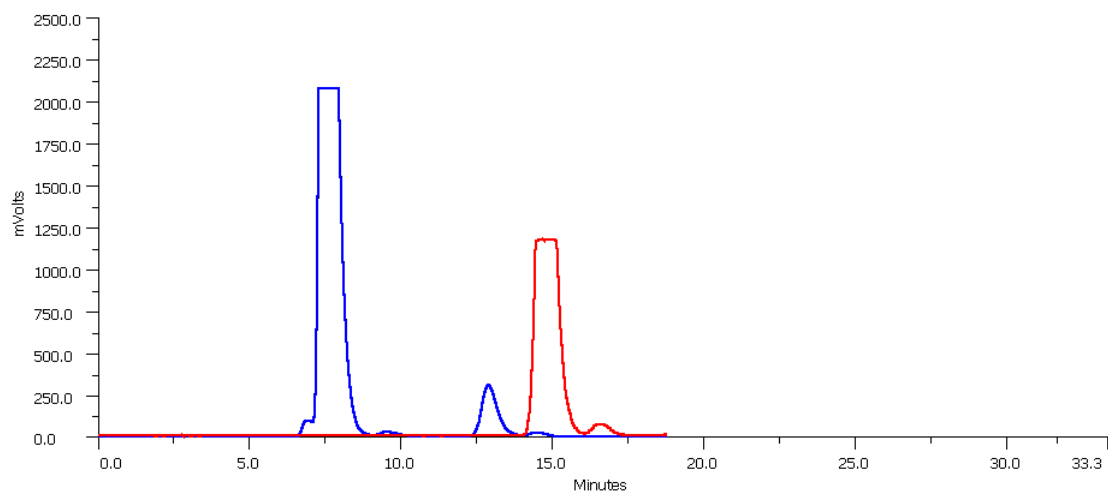

**Fig. S1** Preparative-HPLC chromatogram of [ $^{18}\text{F}$ ]Fluoromethyl-PBR28 ([ $^{18}\text{F}$ ]1). Column: Xterra RP-18, 10  $\mu\text{m}$ , 10  $\times$  250 mm with a guard cartridge (Phenomenex, 10  $\times$  10 mm); Eluent: 45%  $\text{CH}_3\text{CN}/\text{H}_2\text{O}$ ; Flow rate: 3 mL/min; Blue line: UV-254 nm; Red line: gamma-ray.

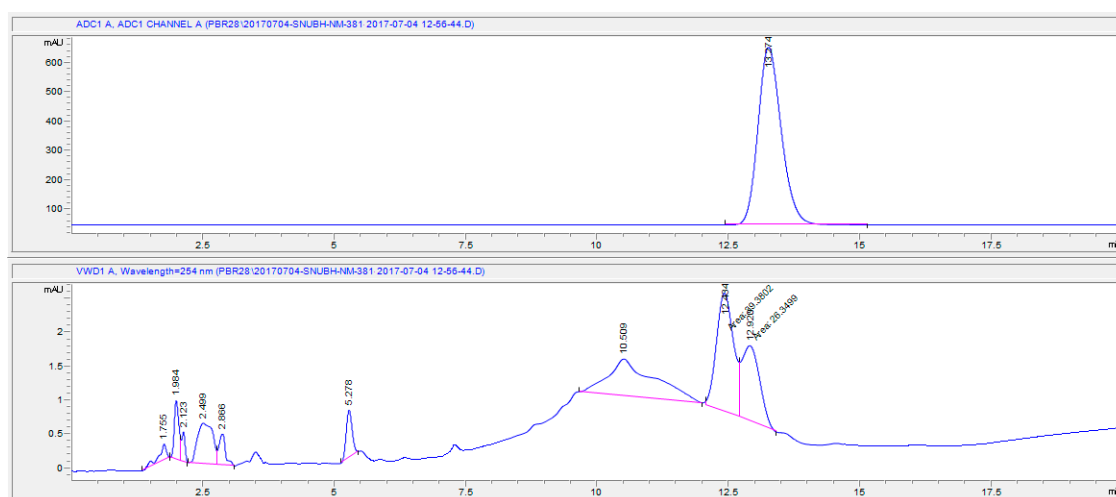

**Fig. S2** Analytical HPLC chromatogram of pure [ $^{18}\text{F}$ ]Fluoromethyl-PBR28 ([ $^{18}\text{F}$ ]1). Column: Xterra RP-18, 5  $\mu\text{m}$ , 4.6  $\times$  250 mm; Eluent: 65%  $\text{CH}_3\text{CN}/\text{H}_2\text{O}$ ; Flow rate: 1 mL/min; Upper: gamma-ray; Bottom: UV-254 nm.

## II. Representative HPLC chromatogram for [ $^{18}\text{F}$ ]CB251

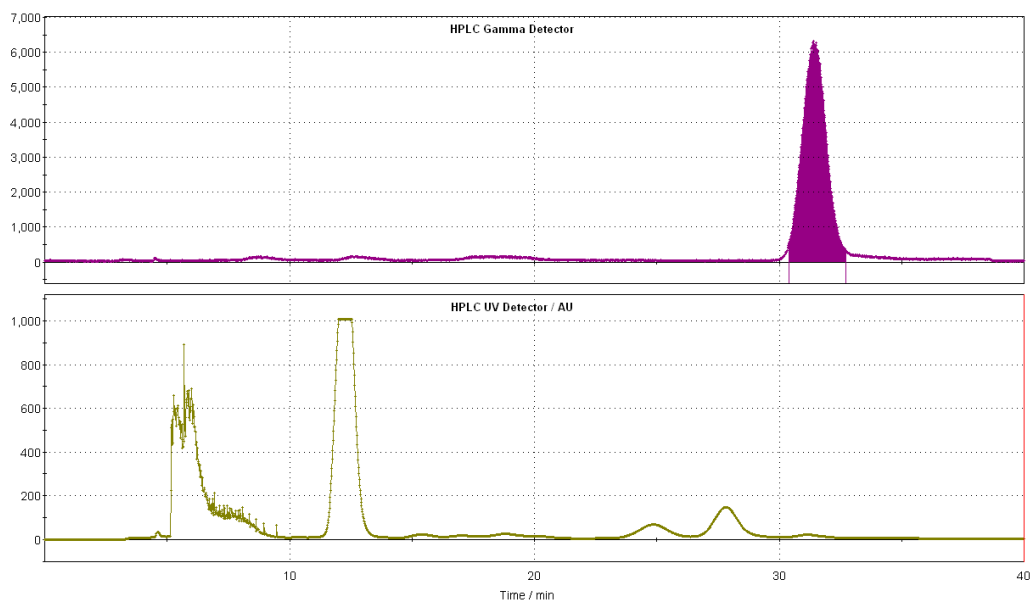

**Fig. S3** Preparative-HPLC chromatogram of [ $^{18}\text{F}$ ]CB251 ([ $^{18}\text{F}$ ]2). Column: Xterra RP-18, 10  $\mu\text{m}$ , 10  $\times$  250 mm with a guard cartridge (Phenomenex, 10  $\times$  10 mm); Eluent: 55%  $\text{CH}_3\text{CN}/\text{H}_2\text{O}$ ; Flow rate: 4 mL/min; Bottom: UV-254 nm; Upper: gamma-ray.

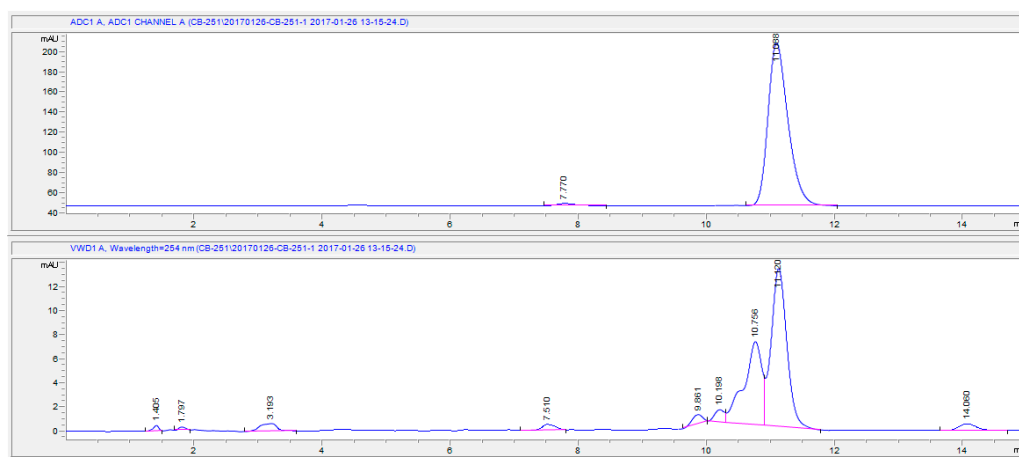

**Fig. S4** Analytical HPLC chromatogram of pure [ $^{18}\text{F}$ ]CB251 ([ $^{18}\text{F}$ ]2). Column: Xterra RP-18, 5  $\mu\text{m}$ , 4.6  $\times$  250 mm; Eluent: 60%  $\text{CH}_3\text{CN}/\text{H}_2\text{O}$ ; Flow rate: 1 mL/min; Upper: gamma-ray; Bottom: UV-254 nm.

### **III. *In vitro* TSPO binding assay**

#### **Method**

Binding affinity to the TSPO was assessed using *in vitro* receptor binding assay. This analysis was conducted as previously described by Denora et al [1].

#### **Result**

The binding affinities of fluoromethyl-PBR28 and CB251 for TSPO and CBR, expressed as inhibition constants ( $K_i$ ), were compared with those of unlabeled PK11195. Fluoromethyl-PBR28 was characterized by a binding affinity for TSPO ( $K_i = 1.85$  nM) while CB251 showed a subnanomolar binding affinity for TSPO ( $K_i = 0.27$  nM).

#### IV. PET images based time-activity curves analysis

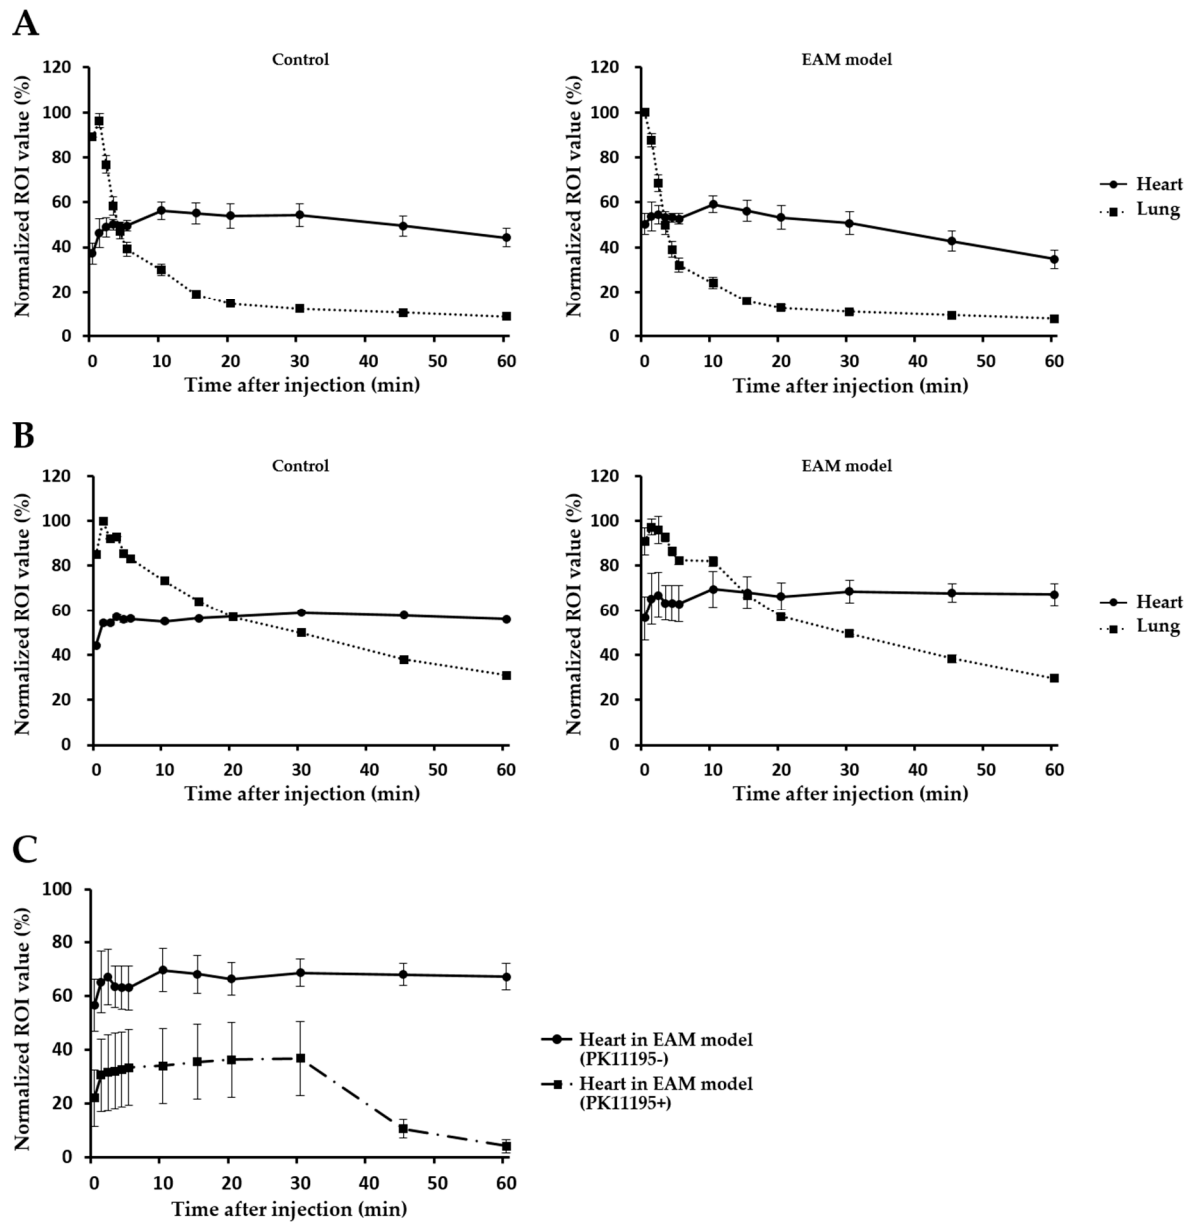

**Fig. S5** MicroPET time-activity curves for [ $^{18}\text{F}$ ]fluoromethyl-PBR28 ([ $^{18}\text{F}$ ]1) and [ $^{18}\text{F}$ ]CB251 ([ $^{18}\text{F}$ ]2) in control ( $n = 5$ ) and EAM model ( $n = 5$ ) during 60 min after injection. Time-activity curves with [ $^{18}\text{F}$ ]1 (A), [ $^{18}\text{F}$ ]2 (B), and PK11195 (10 mg/kg,  $n = 3$ ) treatment before injection of [ $^{18}\text{F}$ ]2 (C). The time-activity curves for the heart and lung are plotted 1 min after injection of [ $^{18}\text{F}$ ]1 or [ $^{18}\text{F}$ ]2. The uptake values in ROI were normalized for the peak uptake value of lung.

## V. Reference

1. Denora, N.; Laquintana, V.; Trapani, A.; Lopodota, A.; Latrofa, A.; Gallo, J.M.; Trapani, G. Translocator protein (TSPO) ligand-Ara-C (cytarabine) conjugates as a strategy to deliver antineoplastic drugs and to enhance drug clinical potential. *Mol Pharm* **2010**, *7*, 2255-2269.
